# Supplementary material for: Reconciling the signal and noise of atmospheric warming on decadal timescales
Source: Copernicus journal article supplement (doi:10.5194/esd-8-177-2017), 2017-03-16
Supplement: Supplementary file [file esd-8-177-2017-supplement-title-page.pdf › esd-8-177-2017-supplement-title-page.pdf]

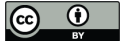

## *Supplement of*

# **Reconciling the signal and noise of atmospheric warming on decadal timescales**

**Roger N. Jones and James H. Ricketts**

*Correspondence to:* Roger N. Jones (roger.jones@vu.edu.au)

- esd-8-177-2017-supplement-title-page.pdf
- Models\_output\_step\_data-Jones&Ricketts.xlsx
- Obs\_output\_step\_data-Jones&Ricketts.xlsx
- esd-2016-35-SI-revision1.pdf

The copyright of individual parts of the supplement might differ from the CC-BY 3.0 licence.
